# Supplementary material for: SMARCE1 suppresses EGFR expression and controls responses to MET and ALK inhibitors in lung cancer
Source: PubMed Central journal article supplement — Cell Res. 2015 Feb 6;25(4):445–58. doi: 10.1038/cr.2015.16 (PMC4387553; doi:10.1038/cr.2015.16), 2015-02-06
Supplement: cr201516x3.pdf [file cr201516x3.pdf]

**Figure S3**

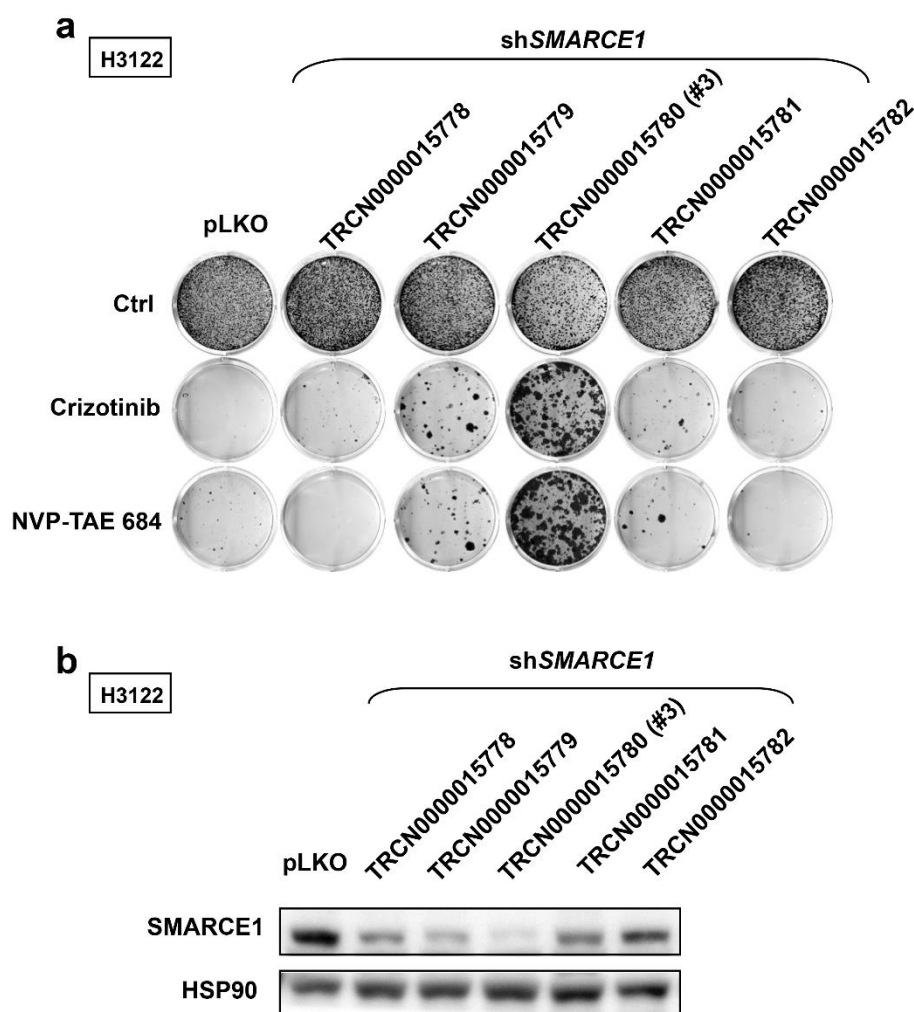

**Supplementary information, Figure S3** Differential SMARCE1 expression

correlates with drug response in H3122 cells.

**(A)** Suppression of SMARCE1 by lentiviral shRNA vectors confers resistance to ALK inhibition in ALK-positive cells. H3122 cells expressing pLKO control or independent lentiviral shSMARCE1 vectors and that were cultured in 300 nM crizotinib or 2.5 nM NVP-TAE684. The cells were then fixed and stained with crystal violet after 14 (untreated) or 28 (treated) days. **(B)** The level of knockdown of SMARCE1 protein in the cells described above (A) was measured by western blotting. Note that

there is a correlation between the knockdown efficiency and drug resistance phenotype among the lentiviral shSMARCE1 vectors tested. TRCN0000015780 was referred as sh*SMARCE1*#3 for the rest of study.
