# Supplementary material for: SMARCE1 suppresses EGFR expression and controls responses to MET and ALK inhibitors in lung cancer
Source: PubMed Central journal article supplement — Cell Res. 2015 Feb 6;25(4):445–58. doi: 10.1038/cr.2015.16 (PMC4387553; doi:10.1038/cr.2015.16), 2015-02-06
Supplement: cr201516x4.pdf [file cr201516x4.pdf]

Figure S4

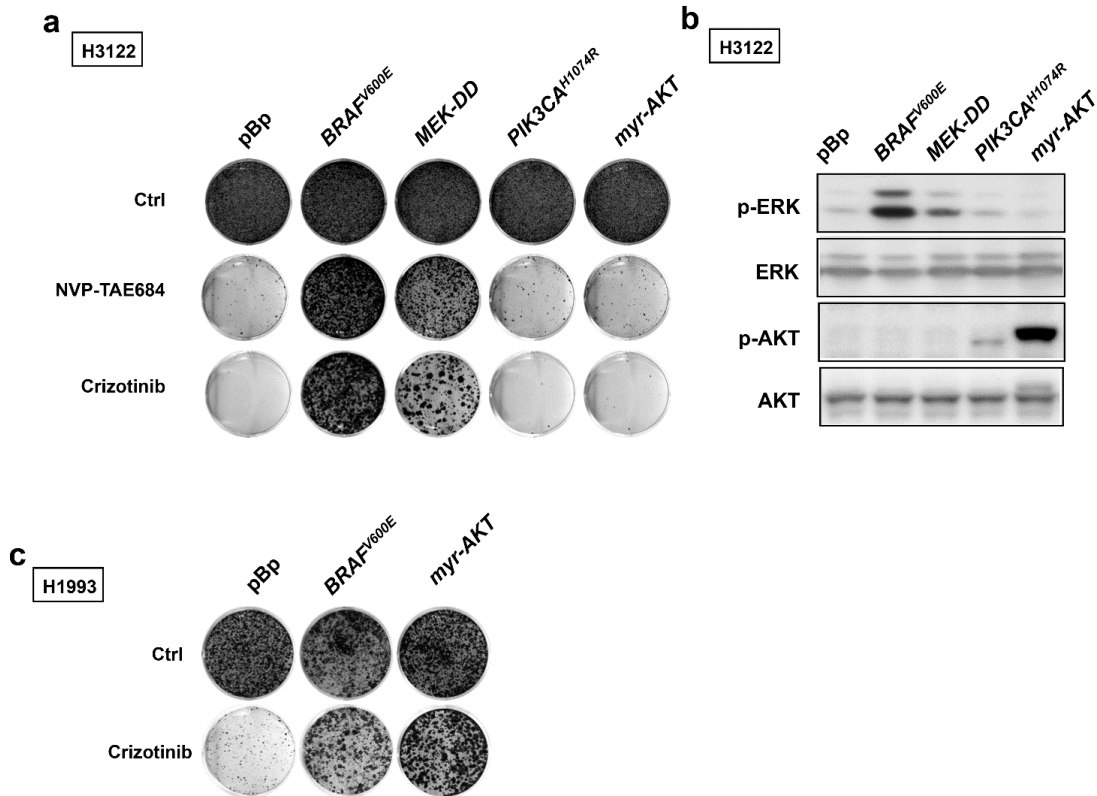

**Supplementary information, Figure S4** MAPK/ERK activation is sufficient to confer resistance to MET and ALK inhibitors in NSCLCs, whereas AKT activation results in resistance to only MET inhibition.

**(A)** MAPK/ERK activation is sufficient to confer resistance to ALK inhibitors in NSCLC cells harboring *EML4-ALK* translocation. H3122 cells expressing pBp control or active alleles of these signalling components of MAPK/ERK and PI3K/AKT cascades (pBpBRAF<sup>V600</sup>, pBp MEK-DD, pBpPIK3CA<sup>H1074R</sup> or pBp-*myr-AKT*) were cultured in the absence or presence of 300 nM crizotinib. The cells were fixed, stained and photographed after 14 (untreated) and 21 (treated) days. **(B)** Western blotting analysis of H3122 cells expressing active alleles of these signalling components of MAPK/ERK and PI3K/AKT cascades. H3122 cells expressing pBp control, pBpBRAF<sup>V600</sup>, pBp

MEK-DD, pBpPIK3CA<sup>H1074R</sup> or pBp-*myr-AKT* were harvested and protein lysates were subjected to immunoblot analysis for the indicated proteins. (C) Activation of ERK or AKT is sufficient to confer resistance to MET inhibition in *MET*-amplified NSCLC cells. H1993 cells expressing pBp control, pBpBRAF<sup>V600E</sup> or pBp-*myr-AKT*, were cultured in the absence or presence of 300 nM crizotinib. The cells were fixed, stained with crystal violet and photographed after 14 (untreated) and 21 (treated) days.
