# Supplementary material for: SMARCE1 suppresses EGFR expression and controls responses to MET and ALK inhibitors in lung cancer
Source: PubMed Central journal article supplement — Cell Res. 2015 Feb 6;25(4):445–58. doi: 10.1038/cr.2015.16 (PMC4387553; doi:10.1038/cr.2015.16), 2015-02-06
Supplement: cr201516x11.pdf [file cr201516x11.pdf]

**Figure S11**

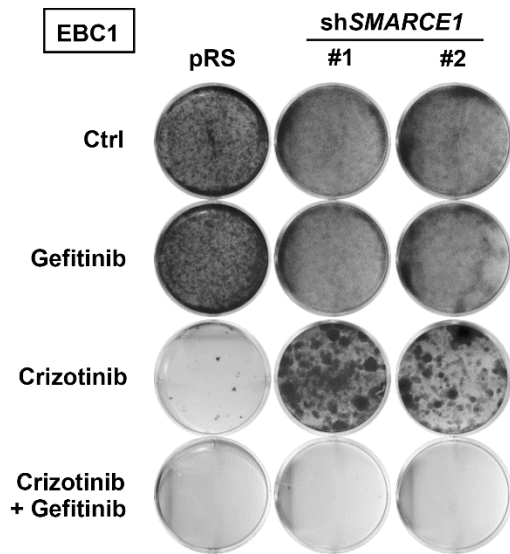

**Supplementary information, Figure S11** EGFR inhibition resensitizes *SMARCE1* deficient EBC1 NSCLC cells to MET inhibitor.

EBC1 NSCLC cells (MET amplified) expressing pRS control or sh*SMARCE1* vectors were cultured in the absence and presence of 50 nM crizotinib, 500 nM gefitinib, or the combination of 1  $\mu$ M 50 nM crizotinib and 500 nM gefitinib. The cells were fixed, stained and photographed after 10 (untreated and gefitinib alone) or 32 days (crizotinib alone and gefitinib plus crizotinib).
